# Supplementary material
Source: HighWire-hosted journal article supplement (https://www.cmaj.ca/highwire/filestream/74001/field_highwire_adjunct_files/0/190568-com-1-at.pdf)
Supplement: 190568-com-1-at.pdf [file 190568-com-1-at.pdf]

**Appendix 1 (as supplied by the authors): Time for Priority 4 MRI Scanning in Ontario (Health Quality Ontario [HQO] Reports, as of November 2018)**

| Percentage Scanned Within Target Time      | 29%            |
|--------------------------------------------|----------------|
| Hospital                                   | Average (Days) |
| <b>Ontario (Province Wide)</b>             | <b>59</b>      |
| <b>By Hospital:</b>                        |                |
| Stratford General Hospital                 | 14             |
| Markham Stouffville Hospital               | 18             |
| Oxford Advanced Imaging Inc. - Ajax        | 19             |
| KMH MRI and Healthcare Centres - Kitchener | 20             |
| Timmins And District General Hospital      | 24             |
| Grey Bruce Health Services                 | 24             |
| Northumberland Hills Hospital              | 27             |
| Quinte Healthcare Corporation              | 31             |
| St. Joseph's Health Centre Toronto         | 33             |
| Women's College Hospital                   | 33             |
| ...                                        | ...            |
| Windsor Regional Hospital                  | 81             |
| Orillia Soldiers' Memorial Hospital        | 85             |
| Royal Victoria Regional Health Centre      | 87             |
| Kingston Health Sciences Centre            | 88             |
| Hamilton Health Sciences Corporation       | 90             |
| Mackenzie Health                           | 97             |
| Hopital Montfort                           | 99             |
| Cornwall Community Hospital                | 107            |
| Sunnybrook Health Sciences Centre          | 132            |
| The Ottawa Hospital                        | 171            |

\*top 10 and lowest 10 centres listed for conciseness

Publicly available online at Health Quality Ontario:

<https://www.hqontario.ca/System-Performance/Wait-Times-for-Diagnostic-Imaging>
